1    **Efficient Assembly and Verification of ZFNs and TALENs for Modifying**  
2    **Porcine *ApoE* gene**  
3    Xu H R, Li T, Guo Y, Li H F, Wang L, Zhang Z Y, Wang X  
4    College of Animal Science and Technology, Shaan'xi Key Laboratory of Molecular  
5    Biology for Agriculture, Northwest A&F University, YangLing, Shaan'xi, P. R.  
6    China, 712100  
7    Xu H R: [xuhuarong2000@163.com](mailto:xuhuarong2000@163.com), College of Animal Science and Technology,  
8    Northwest A&F University, YangLing, Shaan'xi, phone 18359295187  
9    Li T: [lituo0105@126.com](mailto:lituo0105@126.com), College of Animal Science and Technology, Northwest  
10    A&F University, YangLing, Shaan'xi, phone 13281719805  
11    Guo Y: [249898138@qq.com](mailto:249898138@qq.com), College of Animal Science and Technology, Northwest  
12    A&F University, YangLing, Shaan'xi, phone 15191419282  
13    Li H F: [734376331@qq.com](mailto:734376331@qq.com), College of Animal Science and Technology, Northwest  
14    A&F University, YangLing, Shaan'xi, phone 18092165474  
15    Wang L: [wangling619@163.com](mailto:wangling619@163.com), College of Animal Science and Technology,  
16    Northwest A&F University, YangLing, Shaan'xi, phone 15929501559  
17    Zhang Z Y: [zzhang888@gmail.com](mailto:zzhang888@gmail.com), College of Animal Science and Technology,  
18    Northwest A&F University, YangLing, Shaan'xi, phone 15091199929  
19    Corresponding author: Wang X, [wxwza@126.com](mailto:wxwza@126.com), College of Animal Science and  
20    Technology, Northwest A&F University, YangLing, Shaanxi, phone 15029576399  
21

## 22 **Assembling ZFNs and TALENs for Modifying Porcine *ApoE* gene**

23 **Key words:** ZFNs; TALENs; gene knockout; *ApoE* gene; yeast-two-hybrid

24 Corresponding author: Wang X, TaiCheng Road 3, College of Animal Science &

25 Technology, Northwest A&F University, YangLing, Shaan'xi, P. R. China, phone

26 15029576399, [wxwza@126.com](mailto:wxwza@126.com),

27 **Abstract:** Zinc-finger nucleases (ZFNs) and transcription activator-like effector

28 nucleases (TALENs) are powerful tools for genome engineering. These synthetic

29 nucleases are assembled with programmable, sequence-specific DNA-binding domain

30 and a non-specific FokI cleavage domain. Apolipoprotein E (*ApoE*) gene

31 polymorphism is associated with cardiovascular outcomes, including ischaemic stroke

32 and coronary heart disease (CHD). So the objective of this study is to create mutations

33 of *AopE* gene by ZFNs and TALENs technology. Here, we used the

34 Context-dependent assembly (CoDA) method to design and screen ZFNs specifically

35 targeting with *ApoE* gene. The targeted cleavage capacity of these ZFNs was

36 validated in yeast system and HEK 293T cells. Meanwhile, an efficient assembled

37 TALENs to target *ApoE* gene in HEK 293T cells was as a control. The results showed

38 that both ZFNs and TALENs worked on *ApoE* gene with similar high-efficiency

39 cleavage capability. The result would provide efficient methods for genome editing,

40 so as to get disease model for gene therapy for the further study.

## 41 **Introduction**

42 Synthetic zinc finger nucleases (ZFNs) and transcription activator-like effector

43 nucleases (TALENs) are widely used in genomic integration, and formed by fusing

44 programmable specific DNA binding module to the non-specific nuclease domain of  
 45 FokI endonuclease (Cathomen and Joung 2008). The construct of ZFNs and TALENs  
 46 can create a double-strand break (DSB) to either stimulate intracellular DNA repair by  
 47 homologous recombination (HR) with donor DNA or induce gene mutation by  
 48 non-homologous end joining (NHEJ) when without a donor DNA (Jeggo 1998; van  
 49 Gent *et al.* 2001). ZFNs and TALENs-mediated genome engineering has been used in  
 50 many organisms, including cultured cells, as well as in live animals and plants (Kim  
 51 and Kim 2014). Apolipoprotein E (*ApoE*) is an important component of plasma  
 52 apolipoprotein, comprised by 299 amino acids. *ApoE* gene has three alleles, named E2  
 53 and E3 and E4. Due to mutation in 112<sup>th</sup> of *ApoE4*, Cys at this site was substituted for  
 54 Arg. This mutation in *ApoE4* has significant influence on coronary heart disease,  
 55 cerebral infarction and senile dementia etc. diseases (Scarmeas *et al.* 2002).

56 Considering together, we sought to create mutations in *ApoE4* gene by using efficient  
 57 genome editing methods of ZFNs and TALENs. Therefore, taking porcine *ApoE* gene  
 58 as the target site, two specific ZFNs were generated by utilizing CoDA assembly  
 59 method and one TALENs was assembled by our simple method in this study, which  
 60 would provide efficient methods for genome editing and lay foundations for  
 61 producing *ApoE* gene defected cell lines, so as to establish *ApoE* gene defected  
 62 disease model for gene therapy for further study.

## 63 **Material and Methods**

### 64 **Zinc Finger Targeter Selection**

65 The two ZFNs targeting porcine *ApoE* gene was designed by the ZiFiT website  
66 (<http://zifit.partners.org/ZiFiT/ChoiceMenu.aspx>), which allows users to copy and  
67 paste their sequences of interest and returns the available CoDA ZFN sites as well as  
68 the DNA sequences that will encode a particular array.

## 69 **Oligonucleotide Design and Synthesis**

70 For this study, oligos were designed based on the target sequence, and were  
71 synthesized by Biosune Lt. Company (Shanghai). The primer pairs used for plasmids  
72 construction, detection and sequencing in this work are presented in Table 1.

## 73 **Overlapping PCR to Obtain the ZFP Fragments**

74 The ZFP fragments of *ApoE* (ApoE-ZFPs) were amplified by PCR and the products  
75 were purified using the Gel Extraction Kit (Vigorous, Beijing). The total reaction  
76 volumes were as follows: 10 × PCR Buffer 5.0 μL, dNTPs 4.0 μL , forward and  
77 reverse primer 1.0 μL , pfu (5 U/μL) 0.5 μL , DNA 1 μL , adjusting ddH<sub>2</sub>O to 50 μL.  
78 The reaction protocol was: 95° for 5 min, 5 cycles of: 94° for 30 sec, 52° for 30 sec,  
79 and 72° for 30 sec, then add corresponding primers, followed by 30 cycles of: 94° for  
80 30 sec, 52° for 30 sec, 72° for 30 sec and 72° extension for 5 min.

## 81 **Construction of ZFN Expression and Reporter Vectors for Yeast-two-hybrid**

### 82 **System**

83 The left fragment of ZFP (LZFP) was digested by *Xba*I and *Bam*HI (NEB), while the  
84 right fragment of ZFP (RZFP) was digested by *Not*I and *Bam*HI. Then the LZFP and  
85 RZFP were cloned into *Xba*I-*Bam*HI site of JMB440-FokI backbone and *Not*I-*Bam*HI  
86 site of JMB405-FokI vector, respectively. Plasmid DNA was isolated with the

87 E.Z.N.A. Plasmid Mini Kit (OMEGA) and sequenced to confirm whether the left and  
88 right finger inserted into the colonies or not. These vectors were named as LZFN  
89 -JMB440 and RZFN-JMB405. For the corresponding reporter vector, the  
90 oligonucleotides of Ap-BS1, Ap-BS2 (Table 1) were annealed directly to obtain the  
91 double strand DNA with *NotI*-*Bam*HI site and cloned into JMB52 vector, named as  
92 ZFBS1-JMB52 and ZFBS2-JMB52.

### 93 **Screening Specific ZFNs in Yeast-two-hybrid System**

94 To test whether ZFNs work or not, we co-transform the plasmids of LZFN-JMB440,  
95 RZFN-JMB405 and reporter vectors ZFBS-JMB52 into yeast AH109 (Figure 1). The  
96 transformed products were cultured in SD solid medium (-His-Ade-Trp-Leu). As  
97 control, we transformed reporter plasmid only and cultured in SD solid medium  
98 (-His-Ade+Trp+Leu). After 3-day's culture at 30°, reporter plasmids were recovered  
99 from plates (-His-Ade-Trp-Leu) and control plates, respectively. The specific  
100 fragments were amplified by primer FADH1 and gal4ADR. The primer sequences  
101 were listed e in Table 1.

### 102 **Engineering ZFNs Eukaryotic Expression and Reporter Plasmid for Mammalian**

#### 103 **Cells**

104 The aforementioned LZFP and RZFP were cloned into PST1374-L vector. The  
105 plasmids (PST1374-ZFNL, PST1374-ZFNR) were extracted and sequenced. The  
106 protocol of constructing reporter vector for mammalian system (Figure 2) was the  
107 same as that for yeast-two-hybrid assay. The oligonucleotides of BS1 and BS2 were

108 annealed, then inserted into psdRED backbone. The principle of this reporter

109 verification system was the same as Hyojinkim described (2011).

# 110 **Validate Activity of ZFNs in mammalian cells**

111 HEK 293T cells were maintained in DMEM contained 10% fetal bovine serum and

112 seeded into 6-well plates before transfection. A mixed plasmids comprising

113 ZFNL-pst1374 construct, ZFNR-pst1374 construct and BS-psdRED vector were

114 co-transfected in  $3.2 \times 10^5$  cells per well using lipofectamine2000 following the

115 manufacturer's instruction (Invitrogen). As control, cells were transfected with

116 BS-psdRED vector only. After cultivating for 36 h at 37°, the fluorescence was

117 observed by fluorescence microscope system and then DNA was extracted 12 h later

118 and detected by PCR.

# 119 **TALE Targeter Selection and Synthesis**

120 TAL Effector Nucleotide Targeter 2.0 was used to find porcine *ApoE* gene targeter

121 (<https://tale-nt.cac.cornell.edu/node/add/talen>). We chose one target site for

122 assembling TALENs based on our construction protocol of TALE (Zhang et al., 2013).

123 The primers used for plasmids construction, detection and sequencing were

124 synthesized by Shanghai Biosune Company. The entire primer information was

125 presented in Table 1.

# 126 **Construction of TALENs Eukaryotic Expression Vectors**

127 Three tetramer plasmids chosen for construction of TALENs were amplified with

128 primers Tet-Fv\Tet-R1, Tet-F2\Tet-R2 and Tet-F3\Tet-Rv, respectively. Primer

129 sequences were presented in Table 3. Typically, the PCR reaction was: 20 ng

130 plasmids, 1 uL of each forward and reverse primer (5 uM), 0.5 uL Taq DNA  
 131 polymerase (5 U/uL), 5 uL of 10 × Taq polymerase buffer, 5 uL of 10 mM dNTP ,  
 132 finally add ddH<sub>2</sub>O to 50 μL. PCR protocol was 94° for 5 min; 94° for 30 sec, 57° for  
 133 30 sec, 72° for 30 sec, 35 cycles; 72° for 5 min. The amplified tetramer was 465 bp,  
 134 and purified from gels with PCR production purification kit. The three tetramers (50  
 135 ng each) and pST-TALEN-Backbone (150 ng) were added into a 10 uL volume of  
 136 cut/ligation reaction mix with 1 uL of *Bsm*BI (10 U/uL), 1 uL of T4 DNA ligase (400  
 137 U/uL), 1 uL of 10 × T4 DNA ligase buffer and ddH<sub>2</sub>O. The cut/ligation reaction was  
 138 done in a thermocycler with 42° for 5 min, 16° for 5 min, 30 cycles. Then  
 139 transformation was carried out with DH5α using 5 uL cut/ligation reaction mix. The  
 140 transformation mix was plated on LB solid medium containing 100 ug/mL ampicillin  
 141 and incubated at 37° for 12 h. The plasmids were obtained with Plasmid Mini Kit,  
 142 then verified by *Xba*I/*Bam*HI digestion, then the verified plasmids were sequenced  
 143 with primers Seq-F and Seq-R. The completely right plasmid was named by  
 144 pST-ApoE-TALEN.

# 145 **Engineering TALENs Reporter Plasmid for Mammalian Cells**

146 For the corresponding reporter vector, the oligonucleotides of Ap-BS (Table 1) were  
 147 annealed directly to obtain the double strand DNA with *Not*I-*Bam*HI site and cloned  
 148 into psdRED backbone vector. The principle of this reporter verification system was  
 149 the same as Hyojinkim described (2011).

# 150 **Validate Activity of TALENs in Mammalian Cells**

151 HEK 293T cells were cultured with DMEM contained 10% fetal bovine serum and  
152 seeded into 6-well plates before transfection. The transfection was the same as above  
153 described.

## 154 **Results**

### 155 **Three Zinc Finger Sequence Acquired and Oligonucleotide Design**

156 Two pairs of ZFNs target sites were chosen from porcine *ApoE* gene near the  
157 mutation site by utilizing CoDA platform.

158 BS1: 5'-GGCGGCGCAggccgccGTGGGCGCC-3';

159 BS2: 5'-GACCACCGAggagcTGCGGAGCC-3'.

160 In CoDA database, specific three zinc finger proteins were screened, which  
161 recognized 9 bp of left and right, respectively, following the method as described by  
162 Jeffry D Sander et al (2010) (Table 1). After ZFP amino acid being translated, the  
163 primers were designed to amplify the segment of ZFP (Table 2).

### 164 **Engineering ZFNs Activity Assaying**

165 A 270 bp fragment of ZFP was got by overlap PCR (Fig. 3A). The selected ZFPs  
166 were successfully cloned into a ZFN expression vector. Candidate ZFN constructs  
167 were assayed for specific cleavage activity in yeast-two-hybrid (Y2H) system as  
168 previously described (Fig. 3B). The Y2H reporter assay revealed that these two ZFNs  
169 constructs both have high efficiency for reporter gene modification in yeast (>90%).  
170 Based on this result, the cleavage activities of our selected ZFNs were carried out in  
171 mammalian cells. The capabilities were assayed by repairing the reporter gene via  
172 homologous recombination. For both two ZFNs target sites, eukaryotic expression



173 plasmids and corresponding reporter vectors were constructed (Fig. 3C), then  
174 transfected into HEK 293T cells. After transfection about 48 h, the results showed  
175 that these two pairs of ZFNs exhibited a substantially higher mutation frequency  
176 (~10%-20%) (Figure 4).

## 177 **Engineering TALENs and Assaying the Activity**

### 178 **Left and Right TALE Tetramers Chosen for *ApoE* Gene**

179 The TALENs target binding site designed by online tools TAL Effector Nucleotide  
180 Targeter 2.0 was as follows:

181 5'-GGGCGCCGACATggaggacgtgcgaaccGCTTGGTGCTCT-3'. The tetramers for  
182 the construction of left and right TALE were in table 3.

183 The tetramers were assembled by our simple and efficient method (Fig. 5A), then the  
184 specific TALENs was constructed and detected (Fig. 5B). The TALENs were  
185 co-transfected with reporter vector into HEK 293 cells. After 48 h, green light spots  
186 were obtained in the working group (Figure 6), while the control group without  
187 TALENs only showed in red light.

## 188 **Discussion**

189 Until now, as a new genome modification tool, ZFN has been used widely in a variety  
190 of research fields, especially in gene therapy and clinical application. Here, we rapidly  
191 assembled ZFN arrays into a plasmid vector containing heterodimeric FokI nuclease  
192 domains using CoDA method at a comparatively low cost and time-consuming  
193 experimental selection. The activity of ZFNs was tested in yeast system preliminary  
194 (Figure 1) and then in HEK 293T cells (Figure 2). The results indicated that repair

195 efficiency of our assembled ZFNs was as high as 95% in yeast, and about 20% in  
196 HEK 293T cells. These results fully explained CoDA method is an inexpensive, rapid  
197 assembly procedure to screen zinc finger protein.

198 Late-onset Alzheimer's disease (LOAD) risk is strongly influenced by genetic factors  
199 such as the presence of apolipoprotein E  $\epsilon$ 4 allele (referred to here as *APOE4*), as well  
200 as non-genetic determinants including ageing. These data implicate an *APOE4*  
201 associated molecular pathway that promotes LOAD (Rhinn *et al.* 2013). Recently one  
202 meta-analysis suggests that at least one *ApoE*  $\epsilon$ 4 allele has higher risk suffering AD  
203 than controls in Chinese population (Liu *et al.* 2014).

204 How to reveal *ApoE* gene function to obtain functionally and clinically relevant  
205 information means a lot for curing a series of human diseases, such as AD. A major  
206 issue for AD research is lack of animal models that accurately replicates the human  
207 disease, thus making it difficult to investigate potential risk factors for AD such as  
208 head injury (Bates *et al.* 2014). Currently, the main animal model for *ApoE* gene  
209 study is mice (de Castro *et al.* 2014; Klein *et al.* 2014).

210 While due to the high similarities in anatomy, genetics and pathophysiology with  
211 humans, pig has been a top choice as human health and disease model (Walters *et al.*  
212 2012). Human late-onset diseases such as Parkinson's disease (LRRK2, SNCA) and  
213 Alzheimer's disease (TUBD1, BLMH, CEP192, PLA2) may also occur in pigs  
214 (Groenen *et al.* 2012). In this study, we successively constructed both ZFNs and  
215 TALENs to target pig *ApoE* gene in eukaryotic cells. Efficient and convenient tools to

216 knockout *ApoE* gene can provide technical support to produce biomedical model for  
217 human disease.

218 Since there are a variety of methods for study the function of genes, such as gene  
219 knockout, gene silencing, gene overexpression etc. Targeted gene knockdown by  
220 RNAi has provided a rapid, inexpensive, and high-throughput alternative to  
221 homologous recombination (McManus and Sharp 2002). However, knockdown by  
222 RNAi has unpredictable off-target effects, and provides only temporary inhibition of  
223 gene function. These restrictions impede researchers to associate phenotype with  
224 genotype directly and limit the practical application of RNAi technology (Gaj *et al.*  
225 2013). ZFNs and TALENs are relatively mature technologies. These synthetic  
226 nucleases contain programmable DNA-binding domains and non-specific DNA  
227 cutting domains. This combination of simplicity and flexibility has catapulted ZFNs  
228 and TALENs to the forefront of genetic engineering (Gaj *et al.* 2013).

229 We used both ZFNs and TALENs to target *ApoE* gene, and their activities were  
230 detected in yeast and HEK 293 cells through red-green light report system. The results  
231 showed that ZFNs worked better than TALENs. Two pairs of ZFNs were constructed  
232 with CoDA methods. At first we detected their activities in JM109 cells. It's easy to  
233 find out whether they can work or not with *gal4* report system in the yeast (Wang *et*  
234 *al.* 2013). Then we co-transfect ZFNs expression vectors and report vectors into HEK  
235 239 cells to detect if they could work in mammalian cells. The green spots were  
236 obtained in the treatment group, while the control group only showed red light

237 without ZFNs transfection. ZFP is the core part of ZFNs which can decide whether  
238 ZFNs work or not. How to obtain specific zinc finger protein and detect its  
239 DNA-binding activity is the key of ZFN technology. By now mainstream methods of  
240 assemble ZFP are module assembly, OPEN and CoDA. Module assembly is simple  
241 and convenient, but it doesn't consider the module context effect, so this method has  
242 low efficiency (Ramirez *et al.* 2008). Based on bacterial two-hybrid method, Joung's  
243 group designed OPEN method for assembling ZFP (Maeder *et al.* 2008). This method  
244 based on a large ZFP library to fix module context effect. Although with OPEN  
245 method researchers have obtained high activity ZFP and improved the gene targeting  
246 efficiency, this solution is too complex to popularize. Joung's team obviously realized  
247 this issue. In 2011, they created the CoDA protocol. Now with the OPEN ZFP  
248 information foundation, this protocol is feasible for most common organization.  
249 Through designating the middle ZF2 which characterizes universality, ZF1 and ZF3  
250 are easy to be obtained. Although we tried both OPEN and CoDA methods to  
251 assemble ZFNs for targeting *ApoE* gene, the former solution took a long time to carry  
252 out. Meanwhile ZFNs' efficiencies obtained with OPEN method were similar to these  
253 obtained with CoDA method.

254 Move over ZFNs? TALEN technology now has been brought into biotechnology. So  
255 far most of reports claimed that with TALENs it is easier to mutate or reform the  
256 target gene. We built two pairs of TALENs for targeting *ApoE* gene at the same time  
257 to test which kind of tools work better. Only considering the time for assembling  
258 ZFNs and TALENs, it is true that TALENs prevail ZFNs. We assembled TALENs

259 only within one week (Zhang *et al.* 2013), while the assembling of ZFNs took about  
260 one and a half month. With the same red-green light system, we co-transformed  
261 TALENs' expression vectors and report vectors into HEK 293 cells. About 24 hours  
262 later, we could detect the green light in the treatment group. 48 hours later, the  
263 pictures obtained with fluorescence inverse microscope showed that about 10% cells  
264 with green light spot. Three tetramers were used to assemble each side twelve  
265 monomers of TALENs for targeting *ApoE* gene. The binding sites were selected with  
266 the online tool: TAL Effector-Nucleotide Targeter 2.0 (Doyle *et al.* 2012).

267 The contiguous repeat of DNA-binding modules of TALENs affects the efficiency of  
268 targeting gene. TALE-repeats vary in numbers from 15.5 to 19.5 among most of  
269 naturally occurring TALE (Boch and Bonas 2010). Theoretically, the larger TALENs  
270 with more tetramers should have higher efficiency. But the fact is not like that. RVD  
271 composition as well as the size of the repeat array affects target specificity (Morbiter  
272 *et al.* 2011). The in silico analysis revealed that TALE-repeats longer than 12 bp  
273 reached a plateau in TALEN-pair-binding specificity in the euchromatic regions of  
274 the genome (Katsuyama *et al.* 2013), so we chose 12 bp TALE-repeat in this study.

275 Assembling TALENs is much easier than ZFNs, but efficiency of targeting gene is  
276 not so remarkable. Typically TALENs protein size is bigger than ZFNs and TAL  
277 effectors are naturally occurring proteins from the plant pathogenic bacteria genus  
278 *Xanthomonas*. The Cys2-His2 zinc-finger domain represents the most common  
279 DNA-binding motif in eukaryotes and the second most frequently encoded protein

280 domain in the human genome (Gaj *et al.* 2013). In consideration of immunogenicity,  
281 ZFNs which are ubiquitous in nature may not be an issue. But TALENs may have  
282 some problems in gene therapy. Clearly, how to deliver programmable nucleases to  
283 cells safely and effectively also affects the targeting efficiency.

284 Currently genetically engineered pig models are being used for analysis of gene  
285 function in various human diseases, development of new therapeutic strategies as well  
286 as production of biopharmaceutical products (Walters *et al.* 2012). We built both  
287 ZFNs and TALENs to target porcine *ApoE* gene and detected activities in HEK 239  
288 cells with red-green light system. The preliminary application results show that this  
289 approach is effective and feasible.

## 290 **Acknowledgments**

291 This research is supported by Scientific and Technological Project in Shaanxi  
292 province (No. 2014K02-07-01).

## 293 **Literature Cited**

294 Bates, K., R. Vink, R. Martins and A. Harvey, 2014 Aging, cortical injury and  
295 Alzheimer's disease-like pathology in the guinea pig brain. *Neurobiology of*  
296 *Aging* 35: 1345-1351.  
297 Boch, J., and U. Bonas, 2010 Xanthomonas AvrBs3 family-type III effectors:  
298 discovery and function. *Annu Rev Phytopathol* 48: 419-436.  
299 Cathomen, T., and J. K. Joung, 2008 Zinc-finger nucleases: The next generation  
300 emerges. *Molecular Therapy* 16: 1200-1207.

301 de Castro, C. A., A. J. Natali, L. M. Cardoso, A. B. Ferreira-Machado, A. A. Novello  
302 *et al.*, 2014 Aerobic exercise and not a diet supplemented with jussara açai  
303 (*Euterpe edulis Martius*) alters hepatic oxidative and inflammatory biomarkers  
304 in ApoE-deficient mice. *British Journal of Nutrition* 112: 285-294.

305 Doyle, E. L., N. J. Boohar, D. S. Standage, D. F. Voytas, V. P. Brendel *et al.*, 2012  
306 TAL Effector-Nucleotide Targeter (TALE-NT) 2.0: tools for TAL effector  
307 design and target prediction. *Nucleic Acids Res* 40: W117-122.

308 Gaj, T., C. A. Gersbach and C. F. Barbas, 3rd, 2013 ZFN, TALEN, and  
309 CRISPR/Cas-based methods for genome engineering. *Trends Biotechnol* 31:  
310 397-405.

311 Groenen, M. A., A. L. Archibald, H. Uenishi, C. K. Tuggle, Y. Takeuchi *et al.*, 2012  
312 Analyses of pig genomes provide insight into porcine demography and  
313 evolution. *Nature* 491: 393-398.

314 Jeggo, P. A., 1998 Identification of genes involved in repair of DNA double-strand  
315 breaks in mammalian cells. *Radiation Research* 150: S80-S91.

316 Katsuyama, T., A. Akmammedov, M. Seimiya, S. C. Hess, C. Sievers *et al.*, 2013 An  
317 efficient strategy for TALEN-mediated genome engineering in *Drosophila*.  
318 *Nucleic Acids Res* 41: e163.

319 Kim, H., and J. S. Kim, 2014 A guide to genome engineering with programmable  
320 nucleases. *Nature Reviews Genetics* 15: 321-334.

321 Klein, R. C., S. K. Acheson, B. E. Mace, P. M. Sullivan and S. D. Moore, 2014  
322 Altered neurotransmission in the lateral amygdala in aged human apoE4  
323 targeted replacement mice. *Neurobiology of Aging* 35: 2046-2052.

324 Liu, M., C. Bian, J. Zhang and F. Wen, 2014 Apolipoprotein E gene polymorphism  
325 and Alzheimer's disease in Chinese population: a meta-analysis. *Sci. Rep.* 4.

326 Maeder, M. L., S. Thibodeau-Beganny, A. Osiaik, D. A. Wright, R. M. Anthony *et al.*,  
327 2008 Rapid "open-source" engineering of customized zinc-finger nucleases for  
328 highly efficient gene modification. *Mol Cell* 31: 294-301.

329 Maeder, M. L., S. Thibodeau-Beganny, J. D. Sander, D. F. Voytas and J. K. Joung,  
330 2009 Oligomerized pool engineering (OPEN): an 'open-source' protocol for  
331 making customized zinc-finger arrays. *Nat Protoc* 4: 1471-1501.

332 McManus, M. T., and P. A. Sharp, 2002 Gene silencing in mammals by small  
333 interfering RNAs. *Nat Rev Genet* 3: 737-747.

334 Morbitzer, R., J. Elsaesser, J. Hausner and T. Lahaye, 2011 Assembly of custom  
335 TALE-type DNA binding domains by modular cloning. *Nucleic Acids Res* 39:  
336 5790-5799.

337 Ramirez, C. L., J. E. Foley, D. A. Wright, F. Muller-Lerch, S. H. Rahman *et al.*, 2008  
338 Unexpected failure rates for modular assembly of engineered zinc fingers. *Nat*  
339 *Methods* 5: 374-375.

340 Rhinn, H., R. Fujita, L. Qiang, R. Cheng, J. H. Lee *et al.*, 2013 Integrative genomics  
341 identifies APOE ε4 effectors in Alzheimer's disease. *Nature* 500: 45-50.



342 Scarmeas, N., J. Brandt, M. Albert, D. P. Devanand, K. Marder *et al.*, 2002  
343 Association between the APOE genotype and psychopathologic symptoms in  
344 Alzheimer's disease. *Neurology* 58: 1182-1188.

345 Van Gent, D. C., J. H. J. Hoeijmakers and R. Kanaar, 2001 Chromosomal stability  
346 and the DNA double-stranded break connection. *Nature Reviews Genetics* 2:  
347 196-206.

348 Walters, E. M., E. Wolf, J. J. Whyte, J. Mao, S. Renner *et al.*, 2012 Completion of the  
349 swine genome will simplify the production of swine as a large animal  
350 biomedical model. *BMC Med Genomics* 5: 55.

351 Wang, L., J. Lin, T. Zhang, K. Xu, C. Ren *et al.*, 2013 Simultaneous screening and  
352 validation of effective zinc finger nucleases in yeast. *PLoS One* 8: e64687.

353 Zhang, Z., D. Li, H. Xu, Y. Xin, T. Zhang *et al.*, 2013 A simple and efficient method  
354 for assembling TALE protein based on plasmid library. *PLoS One* 8: e66459

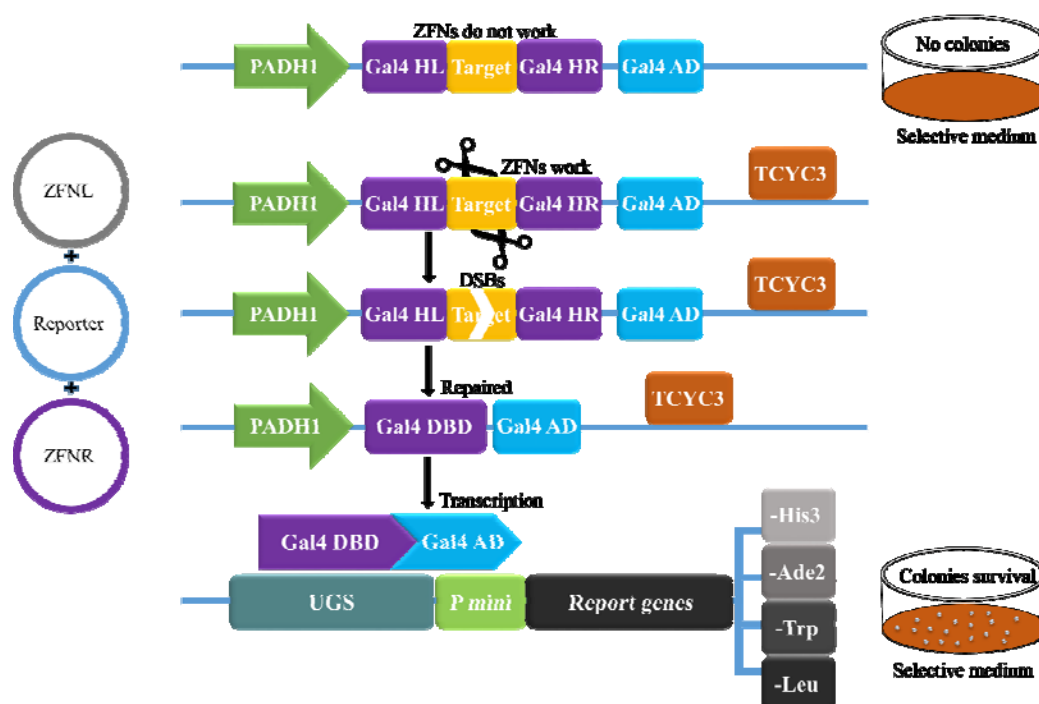

**Figure 1.** Diagram describing yeast-based ZFNs screening and validation system. ZFNs and reporter co-transform into yeasts. If ZFNs do not work, no colonies can survive with selective medium. With this validation system, we can screen the working ZFNs and with control we can obtain a sketchy efficiency of ZFNs by counting colonies number.

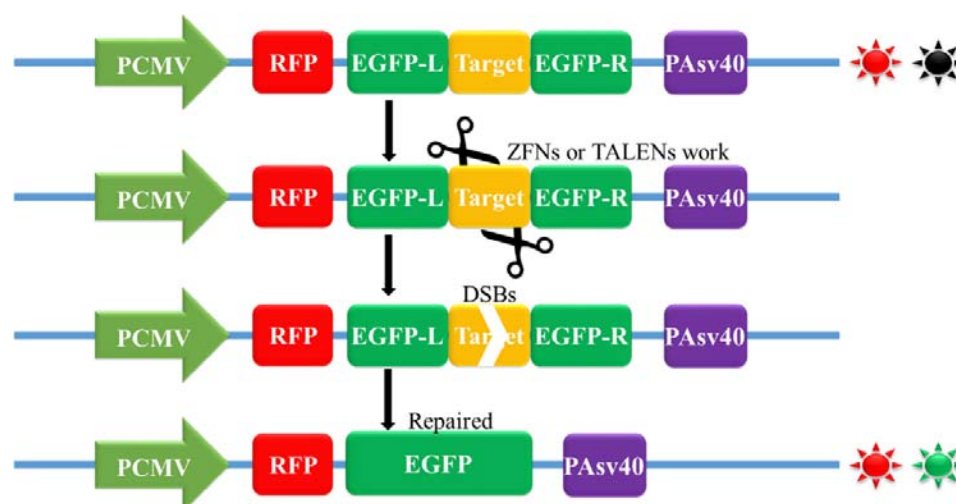

**Figure 2.** Red-Green light report system. In HEK 293 cells, ZFNs and TALENs cut target sequences to induce EGFP repair. In the green field we can obtain green spots if they work. In the same way, we obtain efficiencies by counting green/red spots.

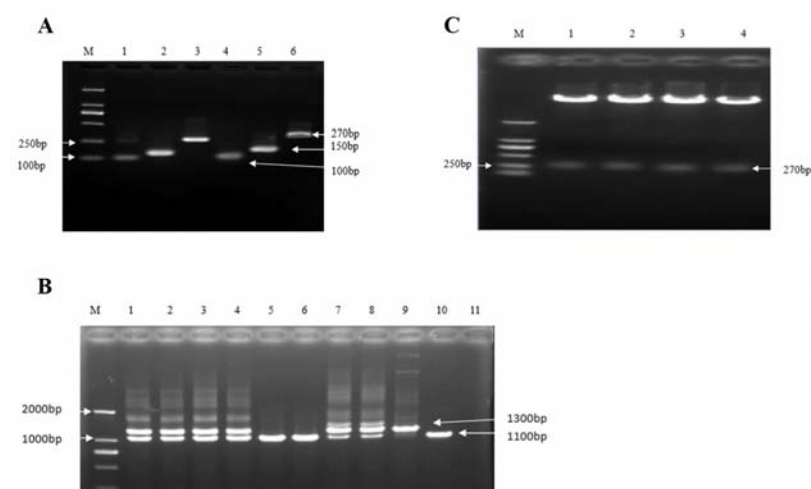

**Figure 3.** Assembling ZFNs. A, The PCR products of ZFPs; B, The PCR products of Gal4BD gene. We detected 1100 bp stripes to identify whether ZFNs work. No.9 is negative control, No.10 is positive control; C, The digestion analysis results of ZFNs eukaryotic expression vectors (M: DL2000 DNA Marker)

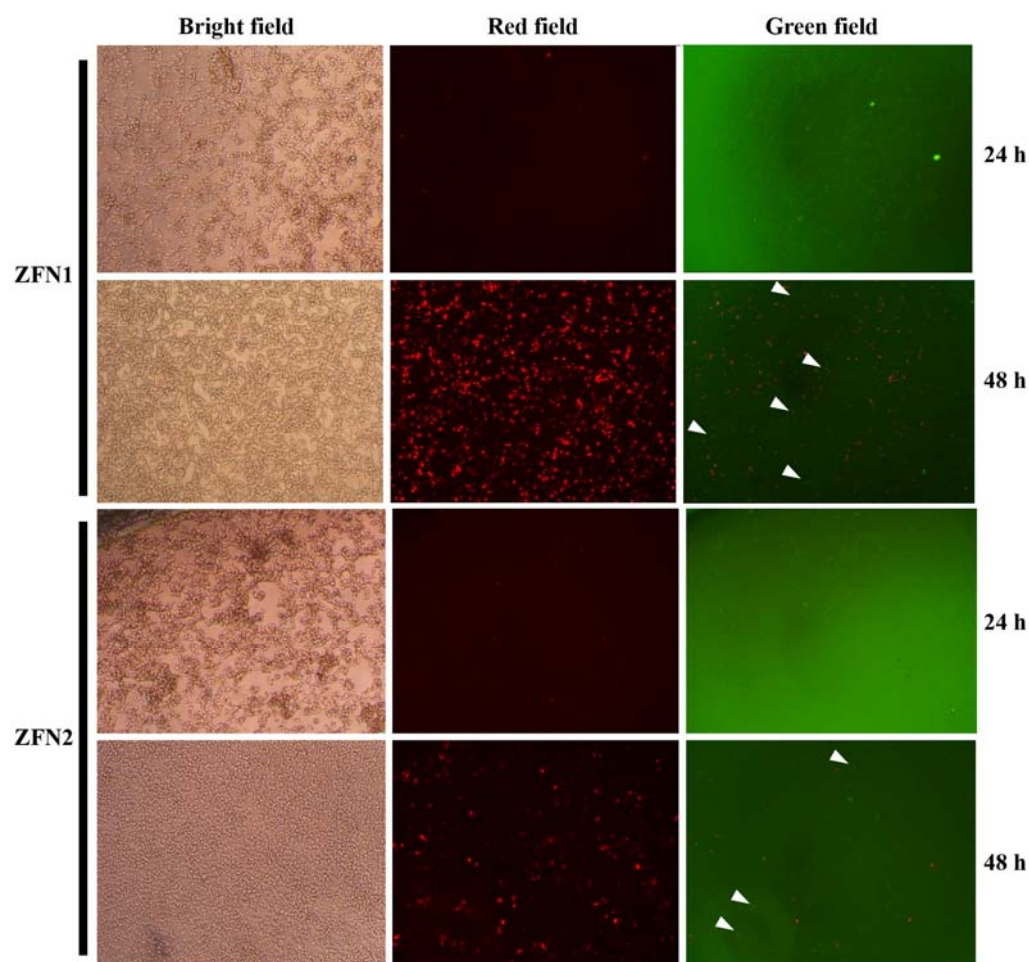

**Figure 4.** Fluorescence results treated by ZFNs in HEK 293T cells. ZFN1 and ZFN2 respectively co-transfect into HEK 293 cells with reporter. If ZFNs work, we can obtain green spots (white triangles) about 48 h later. In the

same way, we can obtain ZFNs efficiency through counting green (sometimes a bit saffron) spots and red spots. ZFN1 is over 20%, while ZFN2 is about 10%.

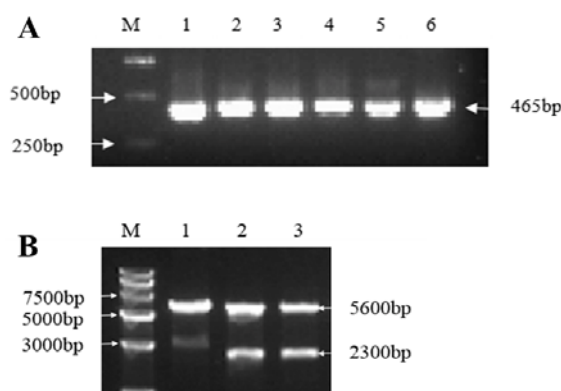

**Figure 5.** Assembling TALENs. A, Amplified tetramers 1-6 by PCR; B, Restriction detection of pST1374-TALEN-ApoE

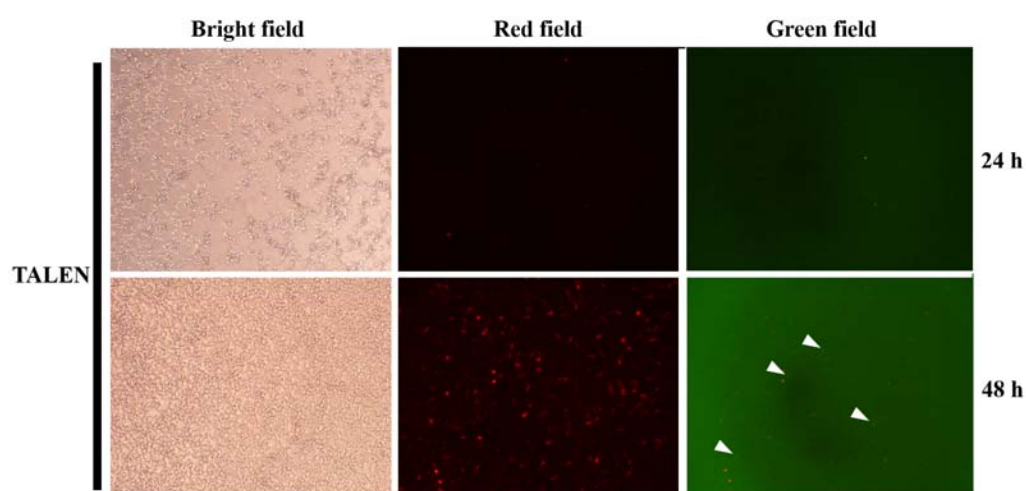

**Figure 6.** Fluorescence results treated by TALENs in HEK 293T cells. Under green field, we observed green spots (white triangles) about 48 h later and estimated TALENs efficiency is about 15%.

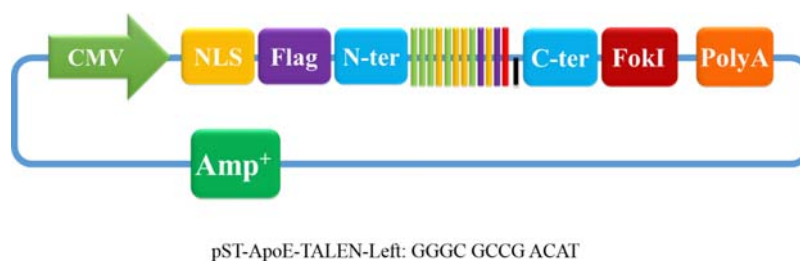

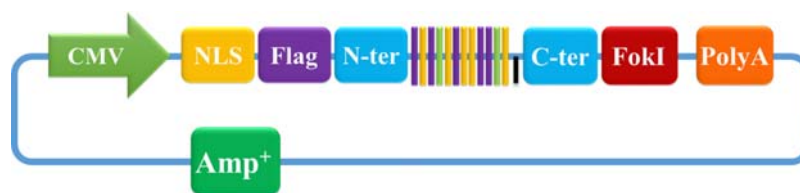

pST-ApoE-TALEN-Right: ACAG CACC AAGC
